# Supplementary material
Source: HighWire-hosted journal article supplement (https://bmjopen.bmj.com/content/12/8/e056840)
Supplement: inline-supplementary-material-1 [file inline-supplementary-material-1.pdf]

## Qualitative Semi-Structured Interview Guide for Focused Group Discussion

|     | Section 1: Exploring Perceptions                                                                   | Probes                                                                                                                                                                                                                                                                                                                                                                                                                                                                       |
|-----|----------------------------------------------------------------------------------------------------|------------------------------------------------------------------------------------------------------------------------------------------------------------------------------------------------------------------------------------------------------------------------------------------------------------------------------------------------------------------------------------------------------------------------------------------------------------------------------|
| 1.1 | What do you think characterizes effective physician-patient communication?                         | <ul style="list-style-type: none"> <li>- Can you comment on the relevance of communication skills in medical training?</li> </ul>                                                                                                                                                                                                                                                                                                                                            |
| 1.2 | How would you comment on your ability to effectively communicate with patients and their families? | <ul style="list-style-type: none"> <li>- Do you find it difficult to explain to the patient or their family their diagnosis/disease prognosis/treatment?</li> <li>- How confident do you feel in disseminating medical knowledge to patients and their families?</li> <li>- What communication strategies do you use to ensure patient compliance?</li> <li>- Do you feel adequately prepared to have difficult conversations with patients and their attendants?</li> </ul> |
| 1.3 | On average, how would you comment on or evaluate your colleagues' communication skills?            | <ul style="list-style-type: none"> <li>- Could you identify specific shortcomings in the communication skills of your colleagues?</li> </ul>                                                                                                                                                                                                                                                                                                                                 |
| 1.4 | How important is rapport building between physicians and their patients?                           | <ul style="list-style-type: none"> <li>- Are you able to develop rapport with your patients?</li> </ul>                                                                                                                                                                                                                                                                                                                                                                      |
| 1.5 | Do you think your body language plays a role in how your patients perceive you?                    | <ul style="list-style-type: none"> <li>- (e.g. posture, eye contact)</li> </ul>                                                                                                                                                                                                                                                                                                                                                                                              |

|                                                 |                                                                                                                   |                                                                                                                                                                                                                                                                                                                                                                                                                                                                                              |
|-------------------------------------------------|-------------------------------------------------------------------------------------------------------------------|----------------------------------------------------------------------------------------------------------------------------------------------------------------------------------------------------------------------------------------------------------------------------------------------------------------------------------------------------------------------------------------------------------------------------------------------------------------------------------------------|
| 1.6                                             | Have you ever had preconceived ideas about certain types of patients leading you to behave with them differently? | <ul style="list-style-type: none"> <li>- (Based on the patient's gender, ethnic background, socioeconomic status, education etc.)</li> <li>- Do customs and traditions of different cultures play a role in informing a patient's decisions regarding health and disease management (patient adherence) and their understanding of disease and its causes?</li> <li>- What impact does the patient's family have on the patient's decision making regarding health and treatment?</li> </ul> |
| <b>Section 2: Difficulties in Communication</b> |                                                                                                                   |                                                                                                                                                                                                                                                                                                                                                                                                                                                                                              |
| 2.1                                             | Have you ever felt that a lack of communication skills was a barrier in patient care?                             | <ul style="list-style-type: none"> <li>- Would you like to provide an anecdotal example?</li> <li>- Are patients able to understand your prescribed disease management strategies?</li> <li>- Do they adhere to preventive measures and medications that you prescribe to them? If not, how do you deal with that?</li> <li>- What is the level of trust patients have in your prescribed disease management strategy?</li> </ul>                                                            |
|                                                 |                                                                                                                   |                                                                                                                                                                                                                                                                                                                                                                                                                                                                                              |

|                                     |                                                                                                    |                                                                                                                                                                                                                                                                                                                                                                                                                                                                                                                                         |
|-------------------------------------|----------------------------------------------------------------------------------------------------|-----------------------------------------------------------------------------------------------------------------------------------------------------------------------------------------------------------------------------------------------------------------------------------------------------------------------------------------------------------------------------------------------------------------------------------------------------------------------------------------------------------------------------------------|
| 2.2                                 | What kind of patients and attendants do you find it particularly challenging to deal with and why? | <ul style="list-style-type: none"> <li>- Most difficult interaction you have had?</li> <li>- Have you faced problems with controlling your temperament during such interactions?</li> </ul>                                                                                                                                                                                                                                                                                                                                             |
| 2.3                                 | Has language ever been a barrier in communicating effectively with patients and their families?    | <ul style="list-style-type: none"> <li>- Difficulty in explaining medical terminologies to patients?</li> <li>- Difficulty in comprehending the symptoms reported by a patient (owing to a different language)?</li> </ul>                                                                                                                                                                                                                                                                                                              |
| <b>Section 3: Existing Training</b> |                                                                                                    |                                                                                                                                                                                                                                                                                                                                                                                                                                                                                                                                         |
| 3.1                                 | Have you received formal/informal communication skills training during your residency?             | <ul style="list-style-type: none"> <li>- If so, do you think the current training provided to you has been adequate in helping you communicate effectively with patients and their families?</li> <li>- Were you taught Urdu/other local language/layman translations of medical terminologies to help you deal with patients who do not understand English?</li> <li>- Are there any specific areas where you felt like you lacked instruction?</li> <li>- Would you want to receive further communication skills training?</li> </ul> |
| <b>Section 4: Recommendations</b>   |                                                                                                    |                                                                                                                                                                                                                                                                                                                                                                                                                                                                                                                                         |

|     |                                                                                             |                                                                                                                                                                                                                                                                     |
|-----|---------------------------------------------------------------------------------------------|---------------------------------------------------------------------------------------------------------------------------------------------------------------------------------------------------------------------------------------------------------------------|
| 4.1 | Do you think a formal curriculum would help individuals improve their communication skills? | <ul style="list-style-type: none"><li>- Which areas would you like the curriculum to specifically focus on?</li><li>- Which pedagogy would you prefer/deem appropriate for the curriculum?</li><li>- Lectures</li><li>- Simulation (Role Plays)</li><li>-</li></ul> |
|-----|---------------------------------------------------------------------------------------------|---------------------------------------------------------------------------------------------------------------------------------------------------------------------------------------------------------------------------------------------------------------------|
